# Supplementary material for: Particle Size and Biological Fate of ZnO Do Not Cause Acute Toxicity, but Affect Toxicokinetics and Gene Expression Profiles in the Rat Livers after Oral Administration
Source: MDPI journal article supplement (doi:10.3390/ijms22041698), 2021-02-08
Supplement: s1 [file s1]

# Particle Size and Biological Fate of ZnO Do Not Cause Acute Toxicity, but Affect Toxicokinetics and Gene Expression Profiles in the Rat Liver after Oral Administration

Jin Yu and Soo-Jin Choi \*

Division of Applied Food System, Major of Food Science & Technology, Seoul Women's University, Seoul 01797, Korea; ky5031@swu.ac.kr (J.Y.)

\* Correspondence: sjchoi@swu.ac.kr; Tel.: +82-2-970-5634; Fax: +82-2-970-5977

Received: 6 January 2021; Accepted: 5 February 2021; Published: 8 February 2021

## Supplementary Materials

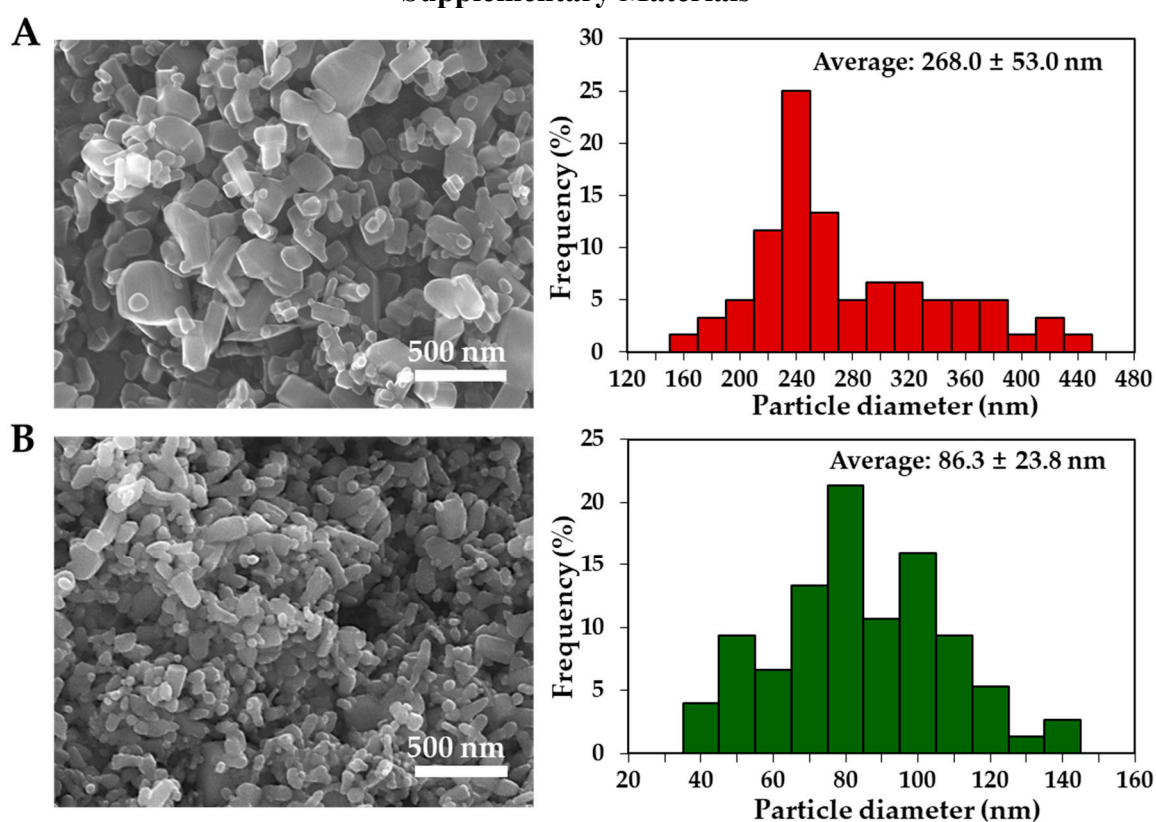

**Figure 1.** Scanning electron microscopy (SEM) images and size distributions of (A) B-ZnO and (B) N-ZnO. Particle size distributions were determined by randomly selecting 200 particles from the SEM images.
